# Supplementary material for: Robust nanoporous NiMn oxide electrocatalysts for the oxygen evolution reaction through defect engineering
Source: Royal Society of Chemistry journal article supplement (doi:10.1039/d4ta02679a), 2024-01-01
Supplement: d4ta02679a1.pdf [file d4ta02679a1.pdf]

## Robust Nanoporous NiMn oxide Electrocatalysts for Oxygen Evolution Reaction through Defect Engineering

Arpit Thomas<sup>a</sup>, Ambrish Kumar<sup>a</sup>, Ram K. Sharma<sup>b</sup>, Edgar C. Buck<sup>c</sup>, Bharat Gwalani<sup>d</sup>, Meha Bhogra<sup>a,#</sup>, Harpreet Singh Arora<sup>a, #</sup>

<sup>a</sup> Department of Mechanical Engineering, Shiv Nadar Institution of Eminence, Deemed to be University, India (UP)- 201310

<sup>b</sup> Centre for Inter-Disciplinary Research and Innovation, University of Petroleum and Energy Studies, Bidholi Via-Prem Nagar, Dehradun-248007

<sup>c</sup> Pacific Northwest National Laboratory, Richland, Washington 99354, United States

<sup>d</sup> Department of Materials Science and Engineering, North Carolina State University, Raleigh, North Carolina 27695, United States

#Corresponding author's E-mail: [harpreet.arora@snu.edu.in](mailto:harpreet.arora@snu.edu.in); [meha.bhogra@snu.edu.in](mailto:meha.bhogra@snu.edu.in)

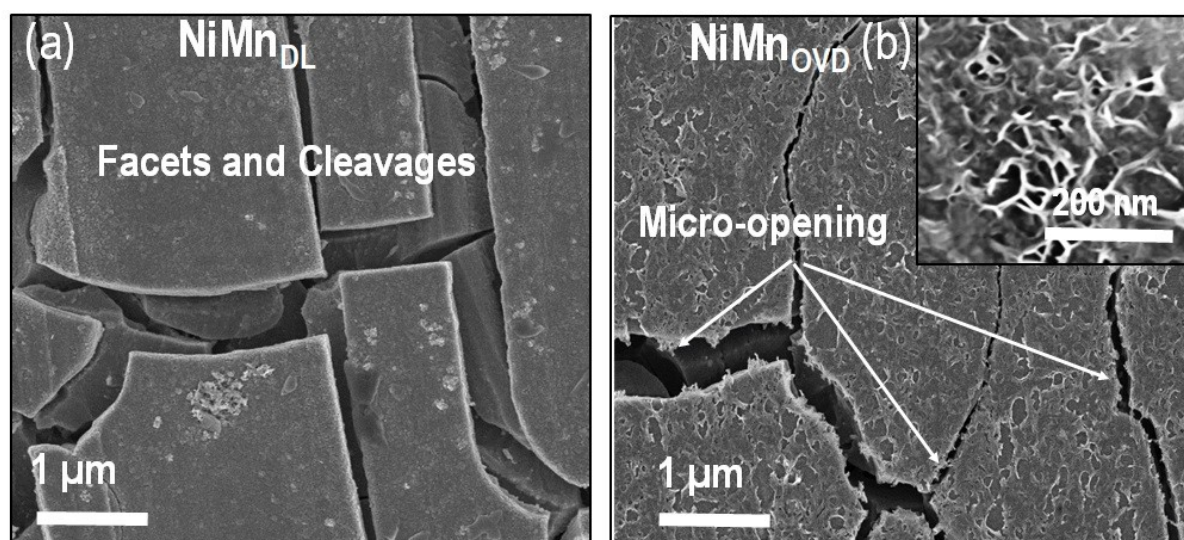

**Figure S1:** Scanning electron microscope (SEM) images of (a) NiMn<sub>DL</sub>, and (b) NiMn<sub>OVD</sub>.

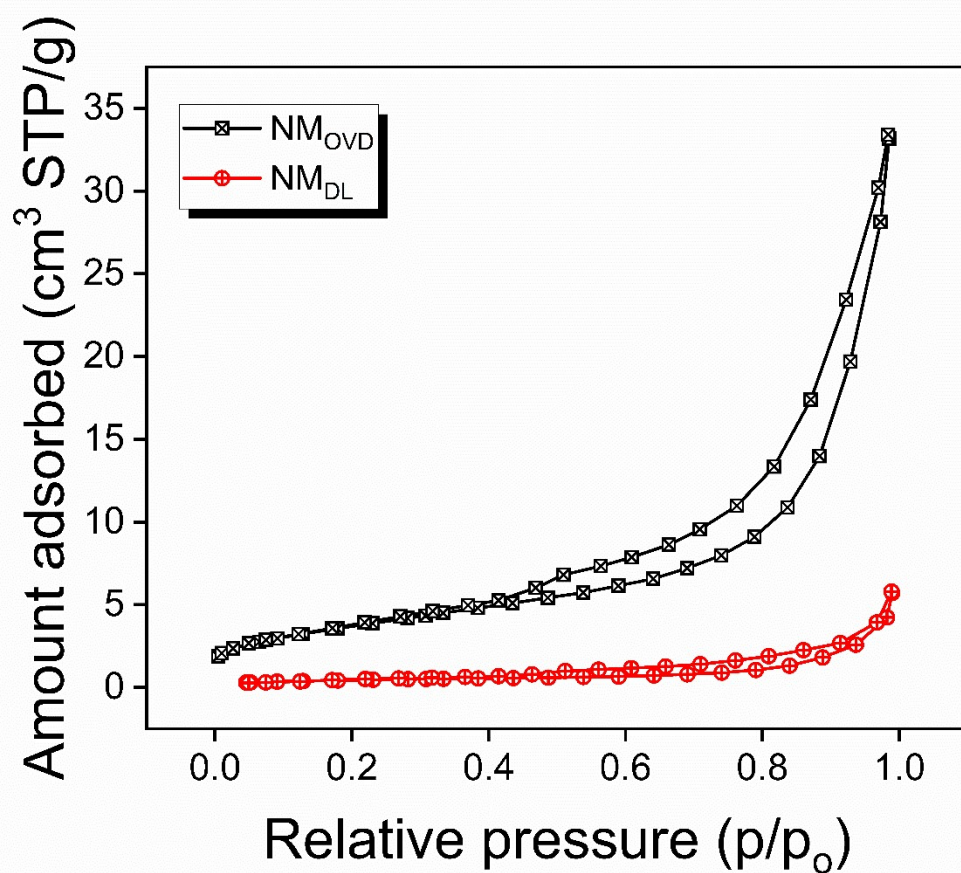

**Figure S2:** BET analysis for NM<sub>OVD</sub> and NM<sub>DL</sub> samples.

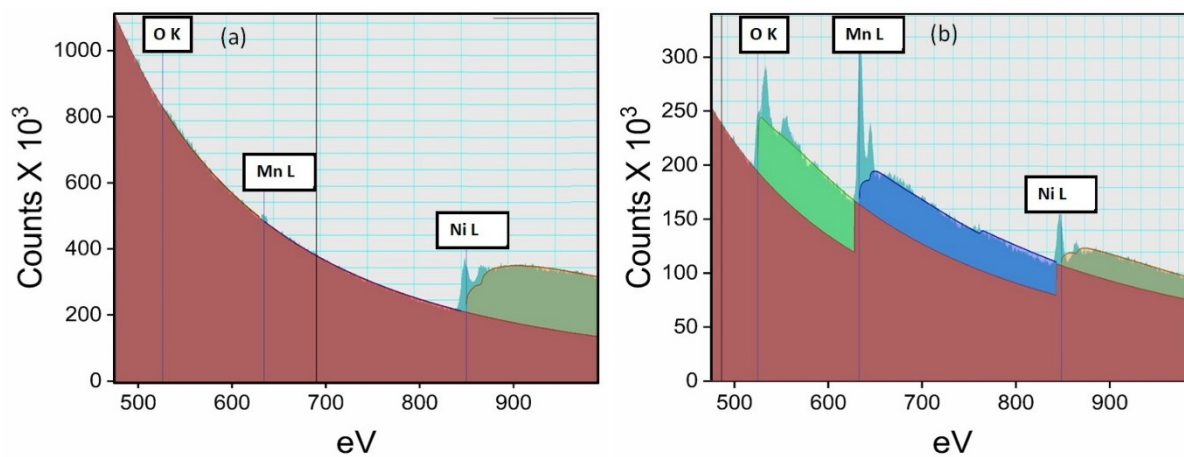

**Figure S3:** Electron energy loss spectroscopy (EELS) analysis- counts vs binding energy (a) for pure Nickel; (b) for NiMnO<sub>3</sub> Phase

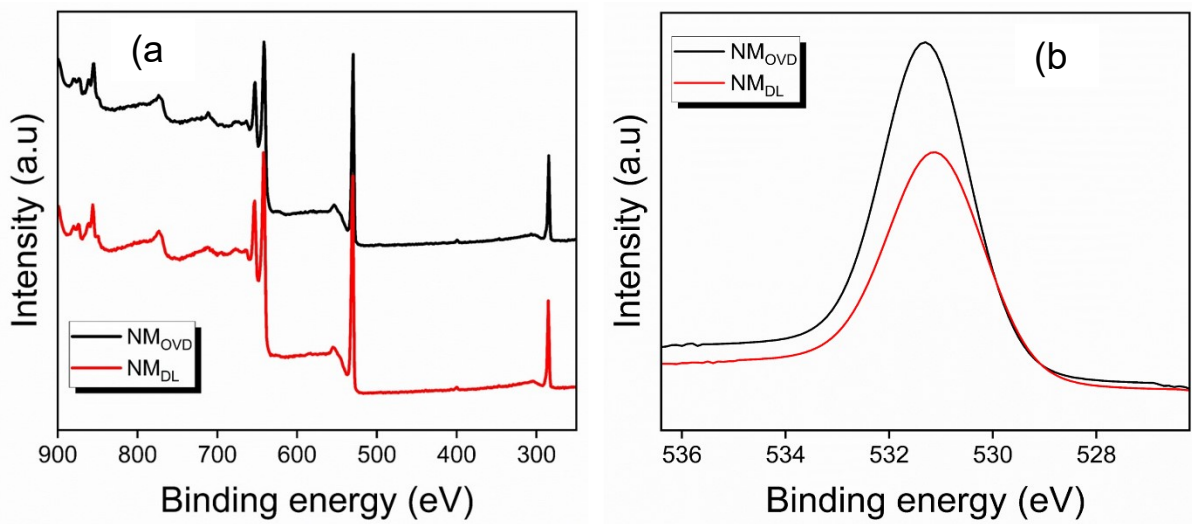

**Figure S4:** (a) XPS survey scan for as-synthesized pristine dealloyed ( $\text{NM}_{\text{DL}}$ ) and deformed dealloyed ( $\text{NM}_{\text{OVD}}$ ) specimen, (b) Comparison of oxygen vacancy peak for  $\text{NM}_{\text{OVD}}$  and  $\text{NM}_{\text{DL}}$  specimen

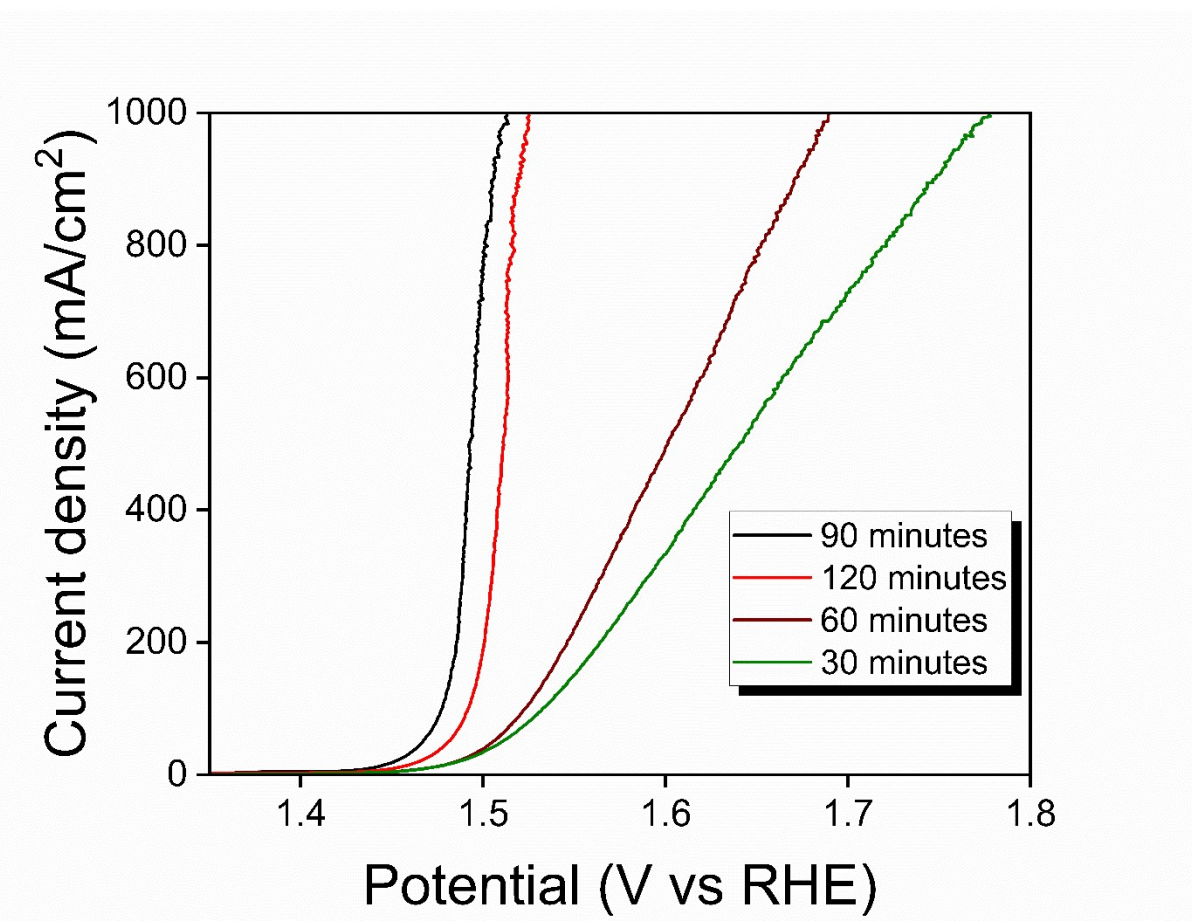

**Figure S5:** Linear sweep voltammetry curves for  $\text{NM}_{\text{OVD}}$  specimen, dealloyed for different time intervals.

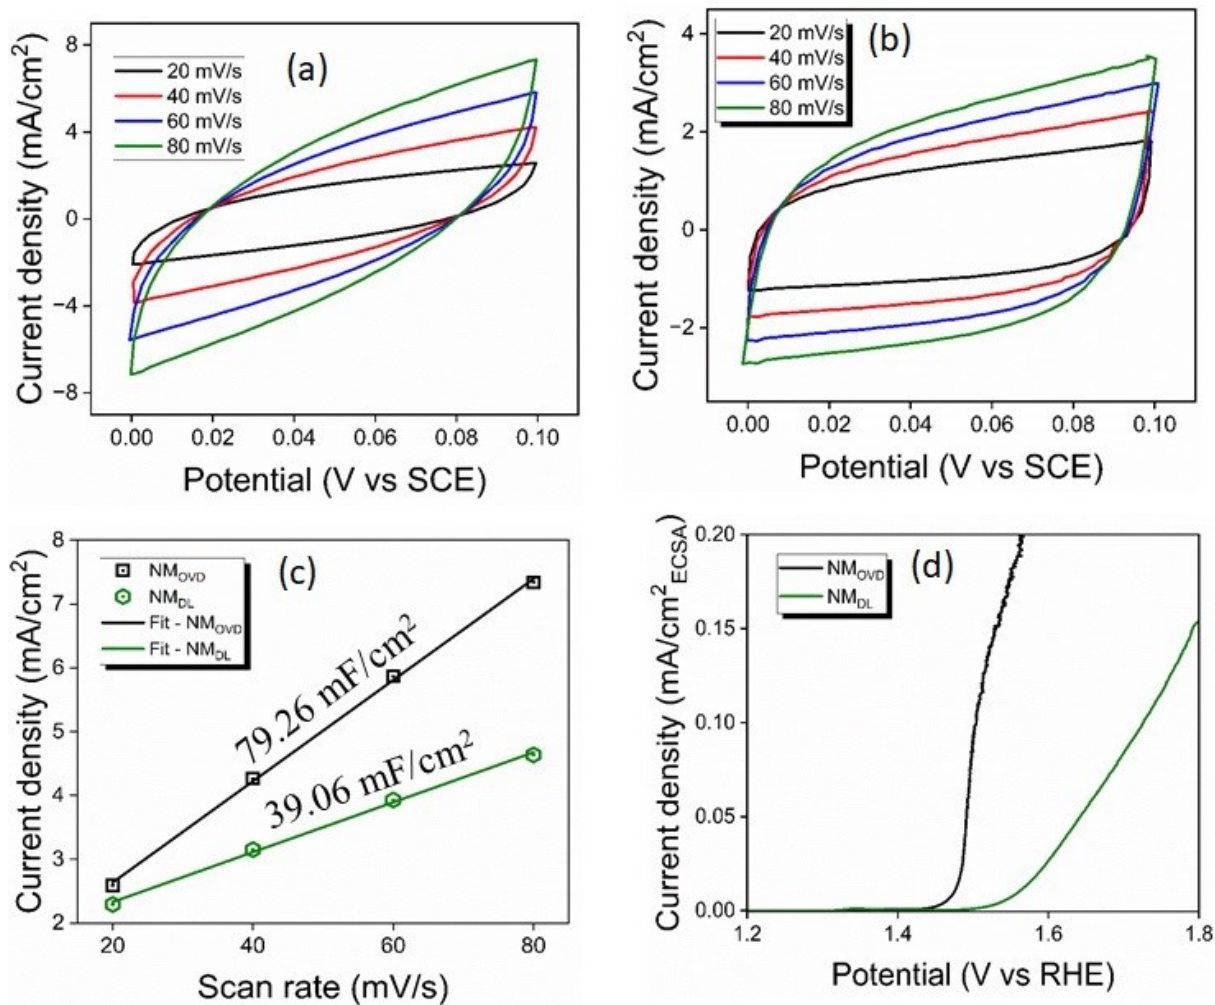

**Figure S6:** Cyclic voltammety curves in the non-faradaic region for (a) NM<sub>OVD</sub>, (b) NM<sub>DL</sub>, (c) double layer capacitance ( $C_{dl}$ ) from cyclic voltammety response, (d) electrochemical active surface area (ECSA) normalized LSV curves for NM<sub>OVD</sub> and NM<sub>DL</sub>.

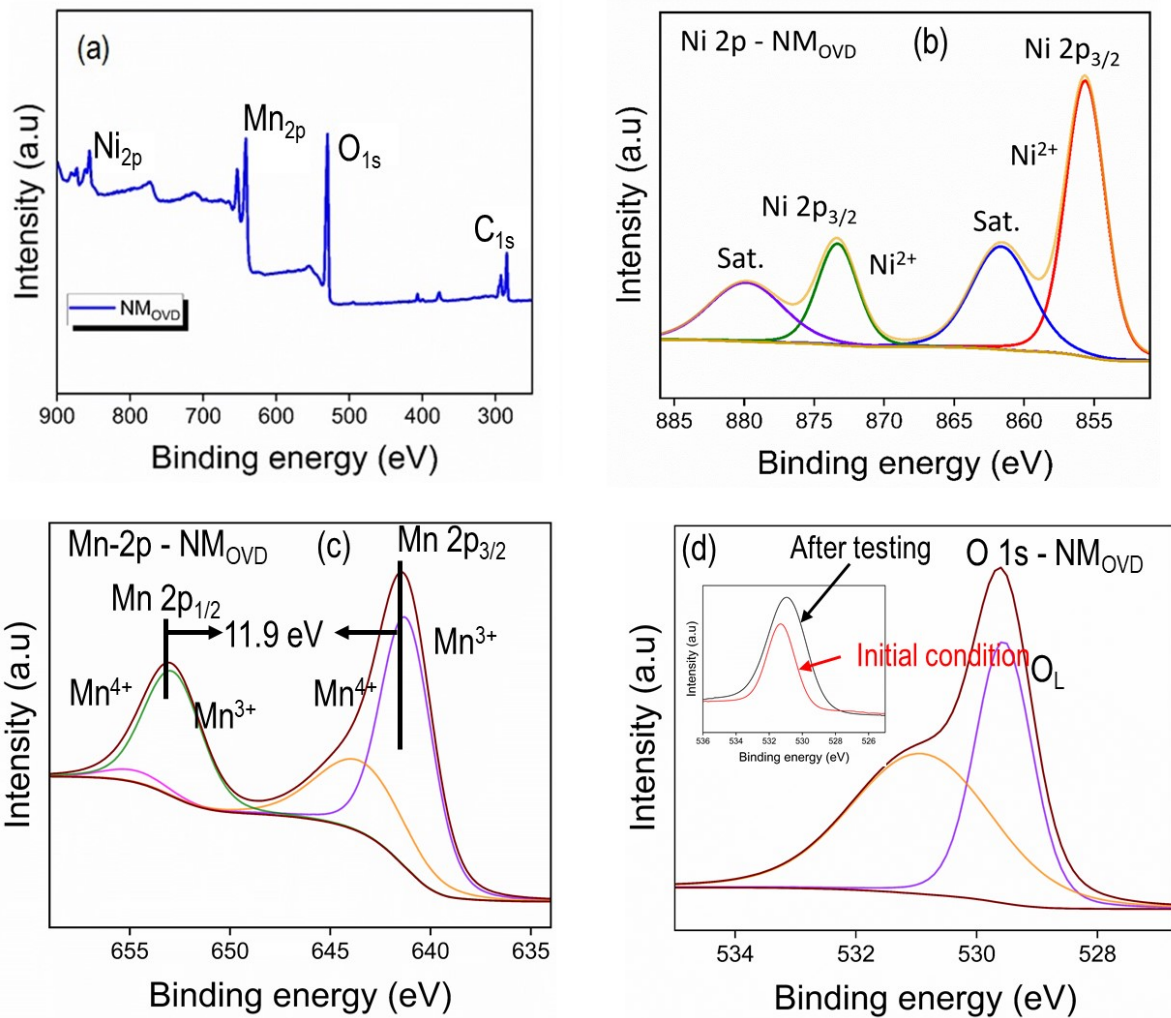

**Figure S7:** (a) XPS survey scan for  $\text{NM}_{\text{OVD}}$  after chronopotentiometry at 500  $\text{mA}/\text{cm}^2$  for 24 hours; (b)-(d) high resolution XPS spectra of  $\text{Ni}_{2p}$ ,  $\text{Mn}_{2p}$  and  $\text{O}_{1s}$  for  $\text{NM}_{\text{OVD}}$  specimen after 24 hour chronopotentiometry test at 500  $\text{mA}/\text{cm}^2$ . Inset of (d) shows the comparison of  $\text{O}_{1s}$  peak before and after OER testing.

**Computational details:** Our calculations are based on first-principles density functional theory (DFT) and spin-polarized plane-wave pseudopotential method as implemented in Vienna Ab Initio Simulation Package (VASP)<sup>1,2</sup>. The ionic core–valence electron interactions are represented with Projector augmented wave (PAW) potentials<sup>3</sup> and electronic exchange–correlation energy is approximated with a generalized gradient approximation (GGA) as parameterized by Perdew–Burke–Ernzerhof<sup>4</sup>. As transition-metal oxides are strongly-correlated systems, the short-range interactions between electrons and electron-localization effects are accounted for by adding Hubbard  $U$  terms. We use rotationally invariant approach to DFT+ $U$ , introduced by Dudarev et al.<sup>5</sup> with  $U = 1.0$  and  $6.0$  eV for Mn and Ni in NiMnO<sub>3</sub> and  $U = 2.5$  and  $3.5$  eV for Mn<sup>2+</sup> and Mn<sup>3+</sup> species in Mn<sub>3</sub>O<sub>4</sub>. The parameters are determined self-consistently to match the electronic band gap and magnetic moments of elements as determined experimentally in the earlier literature. Kohn–Sham wave functions are expanded in a plane-wave basis set truncated with an energy cut-off of 450 eV. Integrations over Brillouin Zone (BZ) are sampled with a uniform (4 4 4) and (2 2 1)  $k$ -grid for Mn<sub>3</sub>O<sub>4</sub> and NiMnO<sub>3</sub> bulk structures respectively, and the atomic structures are relaxed using Broyden, Fletcher, Goldfarb, Shanno (BFGS)-based algorithm until the Hellman–Feynman forces on each atom are lower than 0.01 eV/Angstrom. The transition states (TSS) are obtained using the climbing-image nudged elastic band (NEB) method<sup>6</sup>. Four intermediate images are used in all the NEB calculations. All intermediate images are relaxed until the Hellman–Feynman forces on each atom are within 0.03 eV/Angstrom.

### Nature of OER on NiMnO<sub>3</sub> in high-coverage regime

To further determine how the LOM mechanism proceeds in the presence of surrounding OH ions in the medium (high-coverage regime), we added OH group in the neighborhood of O<sub>L</sub>-O bond (in Figure 6(d)). On energy minimization, the optimized structure shows the formation of \*OOH, \*OH, H<sub>2</sub>O species, along with the O<sub>2</sub> formation (Figure 6(i,j)). Evidently, the chemical interactions of the OH ions and the surface can result in cleaved Ni-O bonds (Figure 6(i)) or dipolar interactions allowing electronic charge transfer between adsorbed species over the NiMnO<sub>3</sub> surface (Figure 6(j)). The latter stems primarily from the high electronegativities of O<sub>L</sub> of Mn-O<sub>L</sub>-Ni and Mn-O<sub>L</sub> sites, which bond strongly with H ion of the OH groups, hence releasing O-O molecules<sup>7</sup>. The broken Ni-O bond re-forms itself in this process (Figure 6(j)), highlighting the cyclic and self-propagating nature of the OER process on NiMnO<sub>3</sub> surface. This reinforces the prevalence of multi-site OER mechanisms, like LOM, in NiMnO<sub>3</sub> over the AEM mechanism prevalent in most transition metal-oxides.

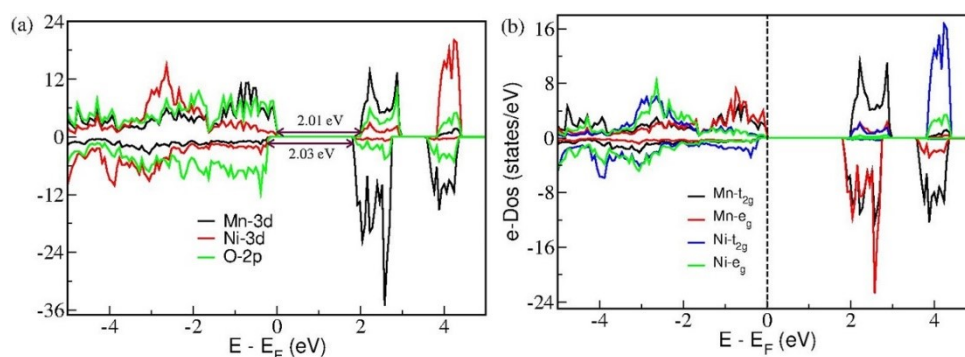

**Figure S8:** Electronic structure of bulk NiMnO<sub>3</sub>, (a) showing a semi-metallic nature with a band gap of  $\sim 2.0$  eV, with prevalence of Mn-3d and O-2p states at the valence band maximum crossing Fermi level, (b) higher density of occupied Mn- $e_g$  orbitals than Mn- $t_{2g}$ , suggesting crucial role of Mn in catalytic performance of NiMnO<sub>3</sub>

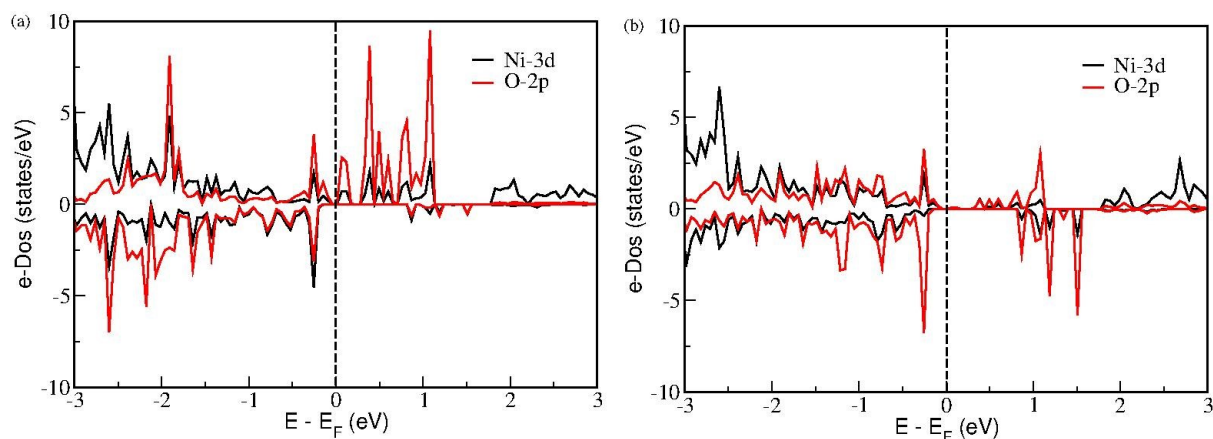

**Figure S9:** Electronic structures of distinct Ni atoms on the (001) surface; (a) Ni atoms with dangling Ni-O bonds (dark blue), and (b) Ni with Ni-Mn-Ni coordinated O atoms (cyan). The former shows an absence of band gap, with high density of O-2p states, signifying electronic charge transfer from O- to Ni. This Ni-O bond cleaves readily and lead to direct evolution of O<sub>2</sub> through LOM mechanism.

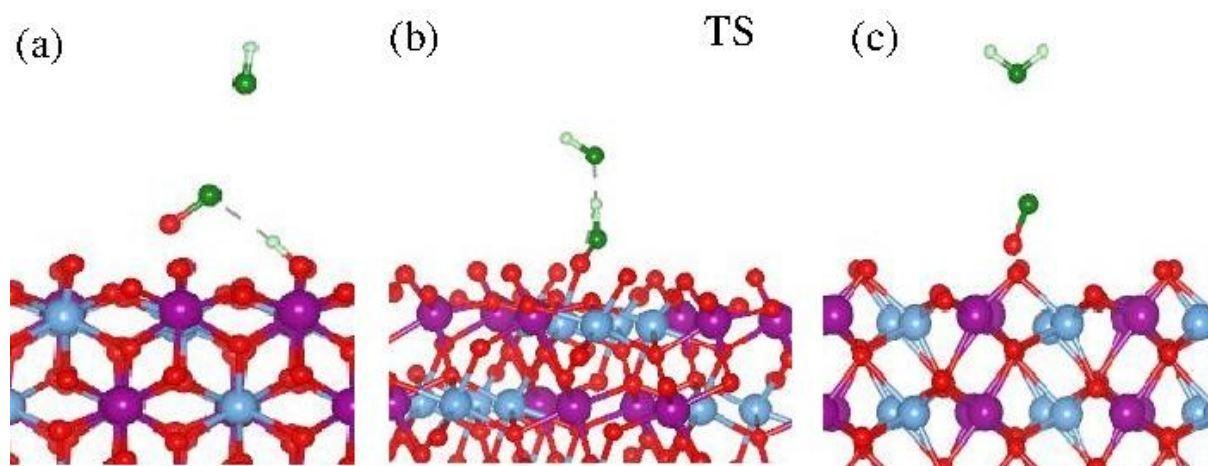

**Figure S10.** Transition state for the reaction intermediate  $*\text{OH} \rightarrow *\text{O}$  on pristine NiMnO<sub>3</sub> surface: (a) starting configuration, DE = 0 eV, (b) transition state, showing formation of H bonds between two OH groups, DE = 0.37 eV, and (c) release of water molecule and resulting deprotonation of OH group, DE = -1.1 eV.

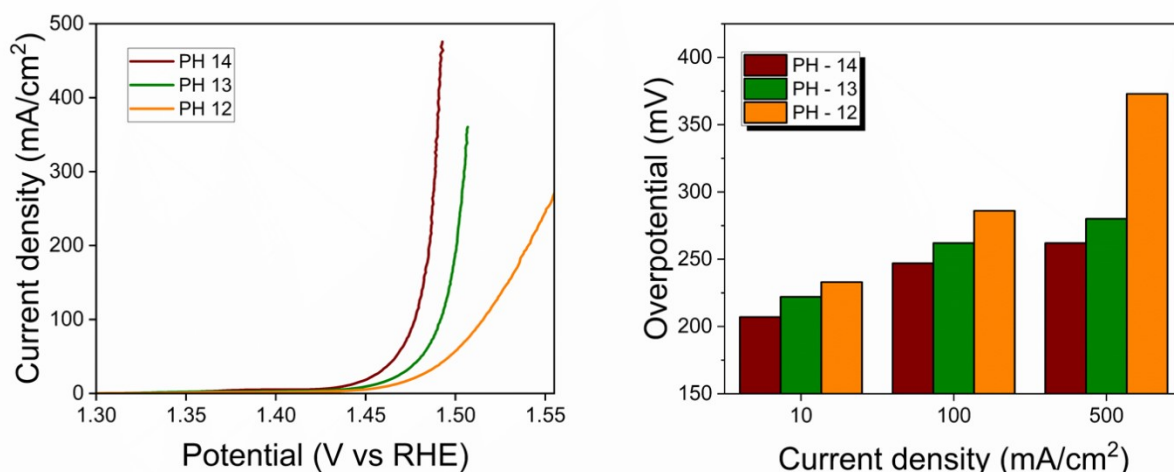

**Figure S11:** OER activity as a function of pH

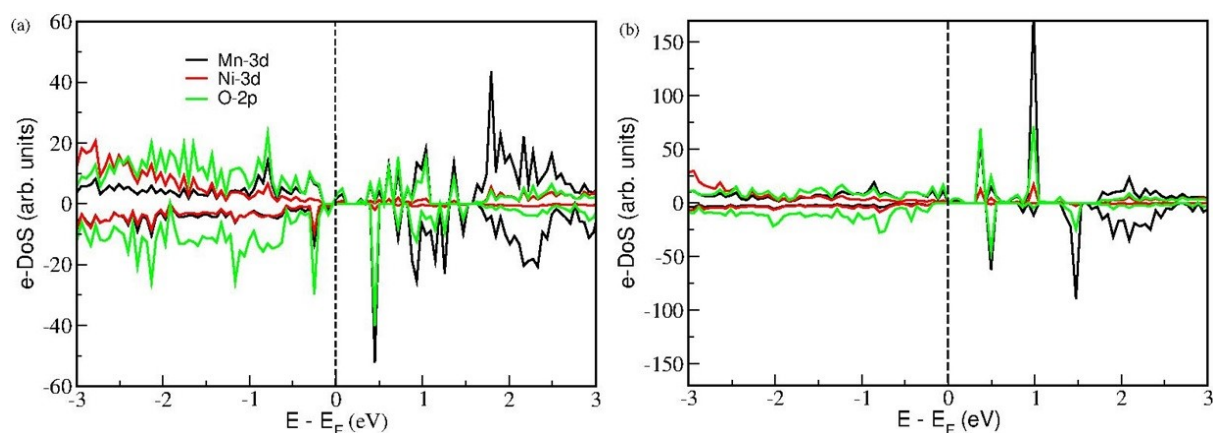

**Figure S12:** Electronic structure of two different vacancy configurations; (a) very low formation-energy configuration involving cleavage of Ni-O bond, and (b) structure involving structural re-construction and formation of Ni-O and Mn-O distorted polyhedra. The e-DoS of latter shows a sharp increase in Mn-3d states in conduction bands signifying enhanced oxidation kinetics of adsorbates.



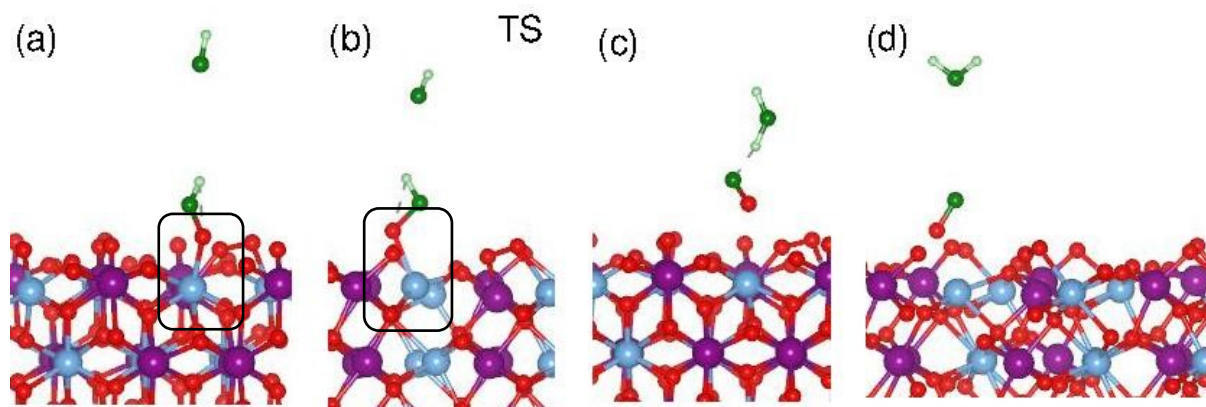

**Figure S13. Transition state for the reaction intermediate  $*\text{OH} \rightarrow *\text{O}$  on  $\text{NiMnO}_3$  surface containing O vacancy:** (a) starting configuration,  $\text{DE} = 0$  eV, (b) transition state, showing long-ranged interaction of OH group with adsorbed OH, resulting in the elongation of Ni-O bond from 1.92 Å to 2.06 Å, signifying cleavage of Ni-O bond and activation of LOM mechanism,  $\text{DE} = 1.32$  eV, (c) formation of  $\text{O}_L\text{-O}$  group and  $\text{H}_2\text{O}$  molecule, showing formation of hydrogen bonds,  $\text{DE} = -1.36$  eV, and (d) release of water molecule,  $\text{DE} = -2.2$  eV.

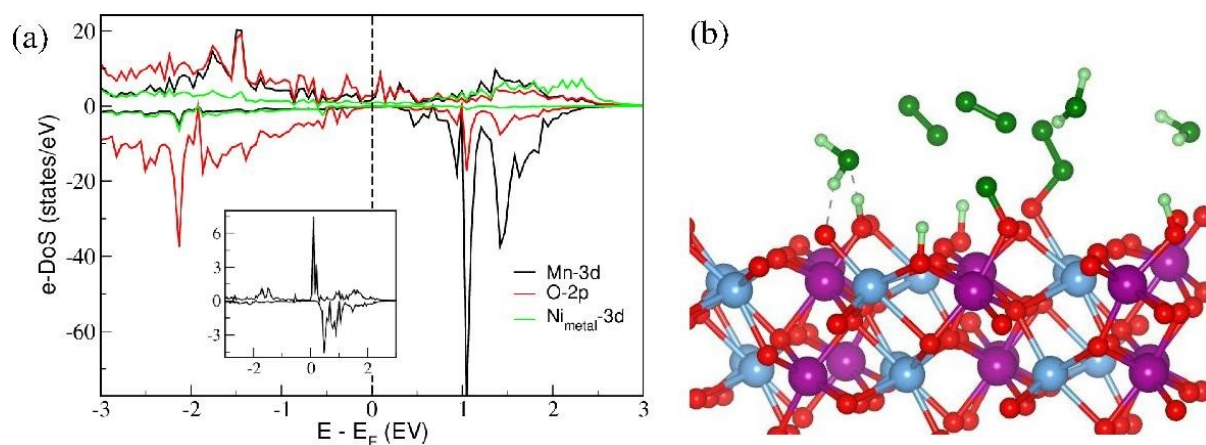

**Figure S14:** Electronic density of Mn-3d, Ni-3d and O-2p states at the Ni/NiMnO<sub>3</sub> junction, showing increase in the density of Mn-3d states in conduction bands. The inset shows the e-DoS of under-coordinated Mn at the interface, showing a sharp increase in density of states at the Fermi-level and in conduction band, strongly indicating its role in OER activity of Ni/NiMnO<sub>3</sub> interfaces, (b) direct O<sub>2</sub> evolution from OH group adsorbed in the neighbourhood of Mn-O-O\* site, due to H adsorption on electronegative O atoms and resulting cleavage of O-H groups.

**Table S1:** Comparison of electro-catalytic OER performance of the  $\text{NM}_{\text{OVD}}$  and other self-supported electrocatalysts in 1 M KOH electrolyte. The  $\eta_x$  corresponds to the overpotential at the current density of  $x \text{ mA cm}^{-2}$ .

| Catalyst                                                | Overpotential (mV) |               | Ref.                                          |
|---------------------------------------------------------|--------------------|---------------|-----------------------------------------------|
|                                                         | $\eta_{500}$       | $\eta_{1000}$ |                                               |
| $\text{NM}_{\text{OVD}}$                                | 262                | 282           | Present Work                                  |
| NiFe/NiFe-OH                                            | 296                | -             | Appl. Catal. B: 2020, 278, 119326             |
| NiFe LDH/FeS                                            | 304                | -             | Adv. Funct. Mater. 2019, 29, 1902180          |
| NiFeOOH/NiFe/Ni                                         | 290                | 300           | Appl. Surf. Sci 2021, 564, 150440             |
| NiCoV-LTH                                               | 340                | -             | ACS Sustain. Chem. Eng. 2020,8, 16091-16096   |
| NiCe@NiFe/NF-N                                          | -                  | 359           | Appl. Catal. B: 2020, 260,118199              |
| Ni-Fe-OH@Ni <sub>3</sub> S <sub>2</sub> /NF             | 370                | -             | Adv. Mater. 2017, 1700404                     |
| Fe-NiMo-NH <sub>3</sub> /H <sub>2</sub>                 | 244                | -             | Adv. Energy Mater. 2020, 10, 2002285          |
| Fe,V-Ni <sub>3</sub> S <sub>2</sub> /NF                 | -                  | 370           | Int. J. Hydrog. Energy, 2022, 47, 14422-14431 |
| Fe-CoP/NF                                               | 295                | -             | Adv. Sci. 2018, 5, 1800949                    |
| Cu@NiFe-LDH                                             | 311                | -             | Energy Environ. Sci., 2017, 00, 1-3           |
| FeOOH(Zn-Fe <sub>x</sub> Ni <sub>(1-x)</sub> OOH        | -                  | 330           | Small, 2022, 18(37), 2203710                  |
| 3D Fe <sup>0</sup> - Ni <sub>x</sub> S <sub>y</sub> /NF | 306                | -             | ChemElectroChem 2018, 5, 3866-3872            |
| 3D                                                      | 340                | -             | J. Mater. Chem. A,                            |

|                                                                                     |     |     |                                            |
|-------------------------------------------------------------------------------------|-----|-----|--------------------------------------------|
| Fe <sub>2</sub> O <sub>3</sub> @Ni <sub>2</sub> P/Ni(PO <sub>3</sub> ) <sub>2</sub> |     |     | 2019, 7, 965-971                           |
| IrNi-FeNi <sub>3</sub>                                                              | 300 | -   | Appl. Catal. B: 2021, 286, 119881          |
| Fe-Ir                                                                               | 300 |     | Appl. Catal. B: 2020, 278, 119327          |
| NCS@CFM-LDH/NF                                                                      | 295 | 332 | Appl. Catal. B: 2022, 121917               |
| NiFeOOH/NiFe/Ni                                                                     | 290 | -   | Appl. Surf. Sci. 2021, 564, 150440         |
| NiFeOOH(Se)                                                                         | 348 | -   | J. Am. Chem. Soc. 2019, 141, 7005          |
| Trimetallic MOFs                                                                    | -   | 284 | Appl. Catal. B: 2020, 119375               |
| NiFeMn/NiFeMn                                                                       | 360 | -   | Energy Environ. Sci. 2016, 9, 540          |
| Ni@NiFeLDH                                                                          | 349 | -   | J. Mater. Chem. A, 2019, 7, 21722          |
| CoMoS <sub>x</sub>                                                                  | 442 | -   | Angew. Chem. Int. Ed. Engl. 2019, 59, 1659 |

1. G. Kresse and J. Furthmüller, *Computational materials science*, 1996, **6**, 15-50.
2. G. Kresse and J. Furthmüller, *Physical review B*, 1996, **54**, 11169.
3. P. E. Blöchl, *Physical review B*, 1994, **50**, 17953.
4. J. P. Perdew, K. Burke and M. Ernzerhof, *Physical review letters*, 1996, **77**, 3865.
5. S. L. Dudarev, G. A. Botton, S. Y. Savrasov, C. Humphreys and A. P. Sutton, *Physical Review B*, 1998, **57**, 1505.
6. G. Henkelman, B. P. Uberuaga and H. Jónsson, *The Journal of chemical physics*, 2000, **113**, 9901-9904.
7. A. Zagalskaya and V. Alexandrov, *ACS Catalysis*, 2020, **10**, 3650-3657.
